# Supplementary material
Source: PubMed Central journal article supplement (PMC3483809)

**Figure 1**

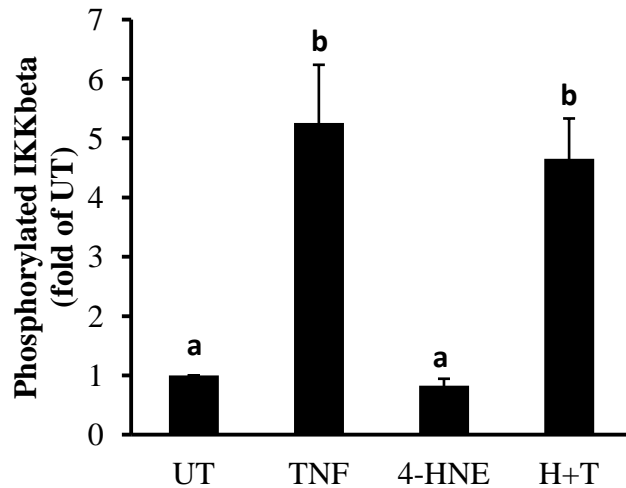

Supplement: mmc1.pdf [file mmc1.pdf]
